# Supplementary material
Source: publisher figshare collection journal article supplement (https://aacr.figshare.com/articles/dataset/_/23627206)
Supplement: Supplementary file 1 [file 41457928]

(1)

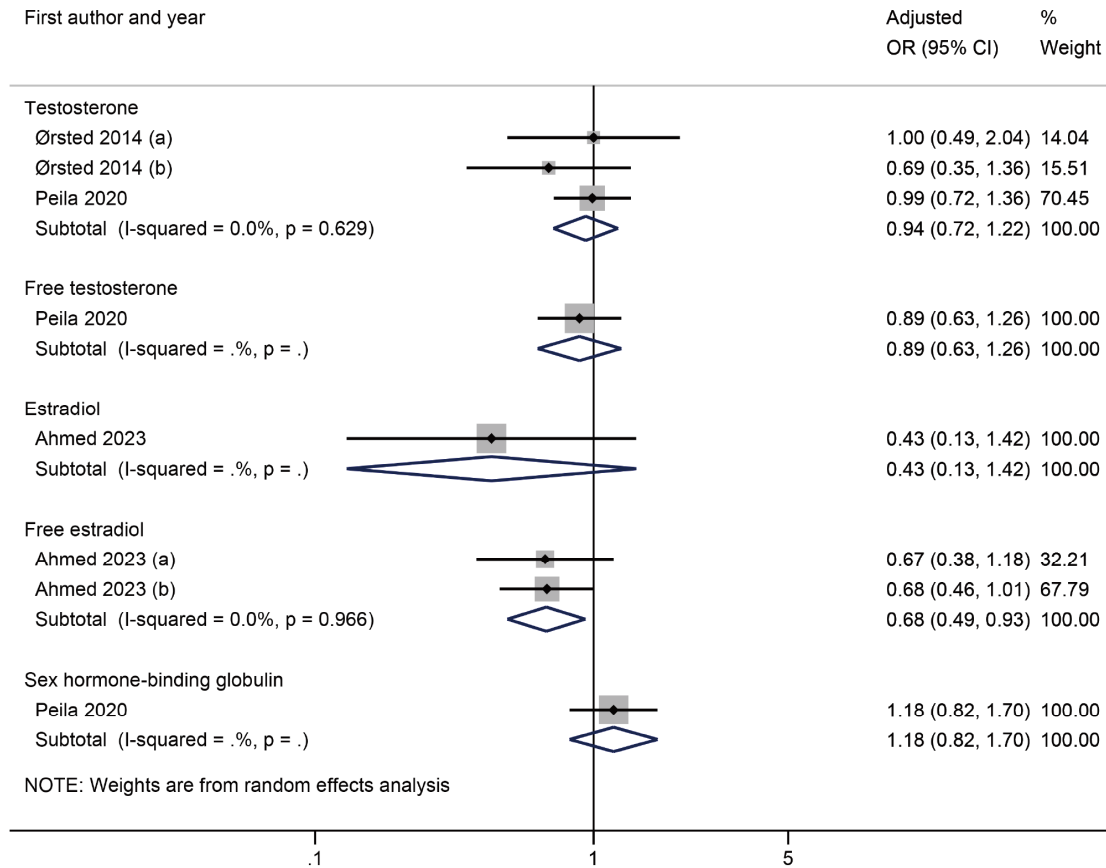

(2)

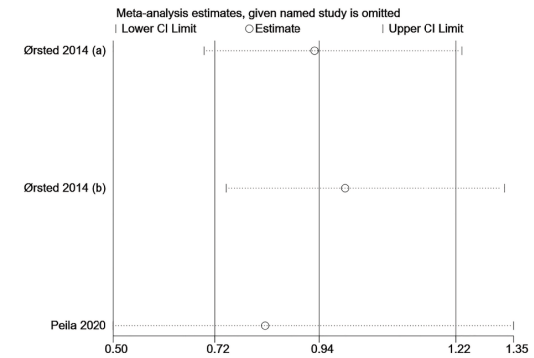

(3)

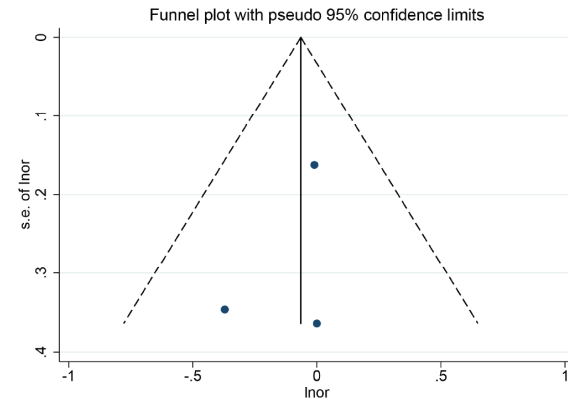

**Supplementary Figure S4. Forest plots, sensitivity analysis and funnel plot of the associations between prediagnostic circulating sex hormone levels and pancreatic cancer risk.** (1) forest plots; (2) sensitivity analysis of testosterone levels; (3) funnel plot of testosterone levels. (a) male; (b) female.
